# Supplementary material for: COVID-19 and Influenza: Vaccination Before and During the Pandemic among the Lebanese Adult Population
Source: bioRxiv or medRxiv preprint supplement (doi:10.1101/2021.02.10.21251392), 2021-02-12
Supplement: Supplementary file [file media-2.pdf]

## FLUVACO – Survey Questions

### Section A: General information

1. What is your gender
  - Male
  - Female
  
2. How old are you?
  - Under 18
  - 18-24
  - 25-34
  - 35-44
  - 45-54
  - 55-64
  - 65+
  
3. What is your area (Mouhafaza) of residency?
  - Akkar
  - Baalbeck-Hermel
  - Beirut
  - Bekaa
  - Mount Lebanon
  - North Lebanon
  - Nabatiyeh
  - South Lebanon
  
4. Which of the following best describes your current occupation?
  - Employed
  - Voluntarily unemployed
  - Involuntarily unemployed
  - Volunteer
  - School student
  - University student
  - Retired
  
5. What is your highest education level ?
  - Uneducated
  - Elementary school
  - Middle school (Brevet)
  - Technical baccalaureate (BT-TS)
  - High school (Baccalaureate)
  - Bachelor or equivalent
  - Master or equivalent
  - Doctorate or equivalent
  
6. What is / was your field of studies?
  - Healthcare / Medicine / Pharmacy / Life Sciences
  - Other
  
7. How many people are currently living in your household, including yourself?
  - 1
  - 2
  - 3
  - 4
  - 5 or more

8. What is your total combined household monthly income? If you do not know your exact income, please estimate
- No income
  - Less than 1,000,000 LBP
  - Between 1,000,000 and 2,500,000 LBP
  - Between 2,500,000 and 5,000,000 LBP
  - Between 5,000,000 and 7,500,000 LBP
  - Between 7,500,000 and 10,000,000 LBP
  - More than 10,000,000 LBP
9. What happened to the purchasing power of your household since the start of the economic crisis in Lebanon (around September 2019)?
- Increased
  - Decreased
  - Neither increased nor decreased

10. Do you have any of the following chronic disease conditions?

|                           | Yes | No |
|---------------------------|-----|----|
| Diabetes mellitus         |     |    |
| Cancer                    |     |    |
| Respiratory disease       |     |    |
| Kidney disease            |     |    |
| Cardiovascular disease    |     |    |
| Liver disease             |     |    |
| Immunodeficiency disorder |     |    |

11. How frequently do you visit a physician?

- Routinely
- Once per 6 months
- Once per year
- When needed

12. How do you feel about vaccines in general?

- Favorable opinion regarding any vaccine (Pro-vaxxer)
- Partially favorable opinion regarding any vaccine
- Unfavorable opinion regarding any vaccine (anti-vaxxer)
- It depends on the disease / vaccine / production company

**Section B: Influenza and Influenza vaccine**

1. General knowledge about influenza (seasonal flu)

|                                         | Yes | No | Not sure |
|-----------------------------------------|-----|----|----------|
| It is caused by a virus                 |     |    |          |
| It can spread from person to person     |     |    |          |
| It can be prevented                     |     |    |          |
| It can cause fever                      |     |    |          |
| It can change / alter from year to year |     |    |          |

2. How do you feel about an influenza infection ?

Not worried     1     2     3     4     5    Very worried

3. In the last five years, how many times did you get the influenza vaccine?

- Every year (then questions 4, 6 of section B)
- Sometimes (then questions 4,5, and 6 of section B)
- Never (then question 5 of section B)

4. What is the main reason why you get the influenza vaccine?

- I want to protect myself, my friends, and my family
- I want to protect the society
- The vaccine is obligatory in my work/college/school
- My physician advised me to get it

5. What is the main reason that you do not get the vaccine?

- I am healthy
- It is expensive
- I am afraid of the side effects
- I got an influenza shot once, so I do not need to get it again

6. When do you usually get the influenza vaccine?

- Before the influenza season
- During the influenza season
- After the influenza season
- When sick with the influenza
- After getting sick with the influenza

7. How often do you take the following precautions (other than vaccination) to protect yourself from the influenza?

|                                                              | Never | Rarely | Sometimes | Often | Always |
|--------------------------------------------------------------|-------|--------|-----------|-------|--------|
| Disinfecting my hands and face                               |       |        |           |       |        |
| Keeping distance from someone showing symptoms               |       |        |           |       |        |
| Quarantining during the influenza season (mainly winter)     |       |        |           |       |        |
| Taking medications and supplements to boost my immune system |       |        |           |       |        |

8. How familiar are you with the influenza vaccine (how it works, efficacy, etc.)?

Not familiar at all     1     2     3     4     5    Very familiar

9. What is your main source of information regarding the influenza vaccine?
- Physician
  - Pharmacist
  - Friends and family
  - Media (including the internet)
  - Government

FLUVACCO

**Section C: COVID-19**

1. General knowledge about COVID-19 (Corona)

|                                     | Yes | No | Not sure |
|-------------------------------------|-----|----|----------|
| It is caused by a virus             |     |    |          |
| It can spread from person to person |     |    |          |
| It can be prevented                 |     |    |          |
| It is the same as the influenza     |     |    |          |
| It can change / alter in the future |     |    |          |

2. How do you rate your obedience (out of 5) in taking precautions regarding the COVID-19 pandemic?

|                                                                           | 1<br>(not good) | 2 | 3 | 4 | 5<br>(very good) |
|---------------------------------------------------------------------------|-----------------|---|---|---|------------------|
| In March 2020 (Phase I: beginning of the cases in Lebanon)                |                 |   |   |   |                  |
| From April 2020 to May 2020 (Phase II: rise in the cases in Lebanon)      |                 |   |   |   |                  |
| From May 2020 to August 2020 (Phase III: drop in the cases in Lebanon)    |                 |   |   |   |                  |
| From August 2020 till present (Current phase: after the Beirut explosion) |                 |   |   |   |                  |

3. Up to this day, were you tested positive for COVID-19 through a PCR?

- Yes
- No

4. How do you feel about a COVID-19 infection ?

- Not worried     1     2     3     4     5    Very worried

5. What is your main source of information regarding COVID-19?

- Physician
- Pharmacist
- Friends and family
- Media (including the internet)
- Government

**Section D: Influenza – COVID-19 intersection**

1. What will you do this winter regarding influenza vaccination ?
  - Surely get the vaccine
  - Most probably get the vaccine
  - Most probably not get the vaccine
  - Not get the vaccine
  
2. What do you think about the following?

|                                                                                                          | Disagree | Neither agree nor disagree | Agree |
|----------------------------------------------------------------------------------------------------------|----------|----------------------------|-------|
| The influenza vaccine will protect me from COVID-19                                                      |          |                            |       |
| I am afraid of catching the influenza and the COVID-19 at the same time                                  |          |                            |       |
| The influenza is present less now due to the precautions during the COVID-19 pandemic                    |          |                            |       |
| The precautions I am already taking during the COVID-19 pandemic will also protect me from the influenza |          |                            |       |
| There is a higher chance of contracting COVID-19 when going to get the influenza vaccine                 |          |                            |       |
| The influenza vaccine will decrease influenza hospitalization, and keep places for urgent COVID-19 cases |          |                            |       |
| The current financial crisis in Lebanon will affect my influenza vaccination decision                    |          |                            |       |

3. To answer the following questions, suppose that a vaccine to prevent a COVID-19 infection is produced and approved for usage

Once the COVID-19 vaccine is available, I will ...

- get both the influenza and the COVID-19 vaccines
- get the influenza vaccine only
- get the COVID-19 vaccine only
- not get the influenza vaccine nor the COVID-19 vaccine

4. How do you feel about the following for this winter ?

|                                                        | Disagree | Neither agree nor disagree | Agree |
|--------------------------------------------------------|----------|----------------------------|-------|
| The influenza vaccine should be obligatory             |          |                            |       |
| The COVID-19 vaccine should be obligatory              |          |                            |       |
| The influenza vaccine should be free of charge         |          |                            |       |
| The COVID-19 vaccine should be free of charge          |          |                            |       |
| The influenza vaccine should be available for everyone |          |                            |       |
| The COVID-19 vaccine should be available for everyone  |          |                            |       |
